# Supplementary material for: Synthesis of manganese oxide nanostructures using bacterial soft templates
Source: Royal Society of Chemistry journal article supplement (doi:10.1039/c1ce05619k), 2011-01-01
Supplement: c1ce05619k.pdf [file c1ce05619k.pdf]

Supporting Information for

# **Synthesis of Manganese Oxide Nanostructures Using Bacterial Soft Template**

*Hyun-Woo Shim, Ah-Hyeon Lim, Kyung-Mi Min and Dong-Wan Kim\**

Department of Materials Science and Engineering, Ajou University, Suwon 443-749, Korea

\* Author to whom any correspondence should be addressed. E-mail: [dwkim@ajou.ac.kr](mailto:dwkim@ajou.ac.kr)

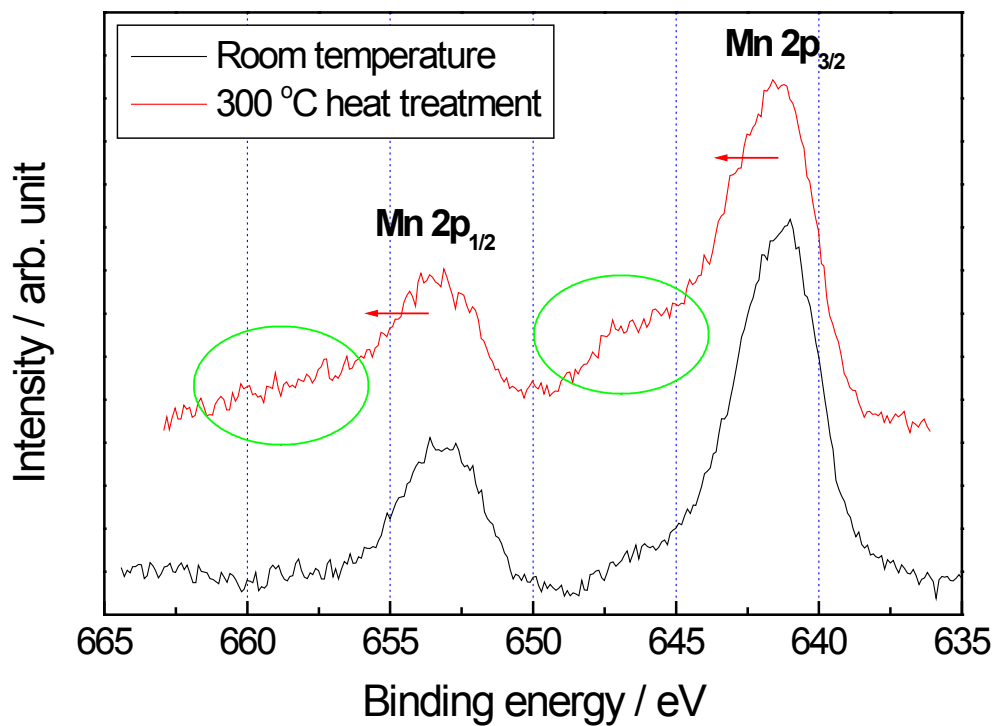

Fig. S1. XPS Mn 2p spectra of each sample prepared from the bacteria/manganese composite rods.
